# Supplementary material
Source: PubMed Central journal article supplement (PMC8440656)
Supplement: NIHMS1685116-supplement-Supplementary_References.pdf [file NIHMS1685116-supplement-Supplementary_References.pdf]

## Supplementary References

- S1. Fend M, Williams L, Carson AJ, et al. The Arc de Siecle: functional neurological disorder during the 'forgotten' years of the 20th century. *Brain* 2020;143(4):1278-84. doi: 10.1093/brain/awaa037 [published Online First: 2020/04/07]
- S2. Hallett M. Psychogenic movement disorders: a crisis for neurology. *Curr Neurol Neurosci Rep* 2006;6(4):269-71. doi: 10.1007/s11910-006-0015-x [published Online First: 2006/07/11]
- S3. Perez DL, Aybek S, Popkirov S, et al. A Review and Expert Opinion on the Neuropsychiatric Assessment of Motor Functional Neurological Disorders. *J Neuropsychiatry Clin Neurosci* 2021;33(1):14-26. doi: 10.1176/appi.neuropsych.19120357 [published Online First: 2020/08/12]
- S4. McWhirter L, Ritchie C, Stone J, et al. Functional cognitive disorders: a systematic review. *Lancet Psychiatry* 2020;7(2):191-207. doi: 10.1016/S2215-0366(19)30405-5 [published Online First: 2019/11/17]
- S5. Baslet G, Bajestan SN, Aybek S, et al. Evidence-Based Practice for the Clinical Assessment of Psychogenic Nonepileptic Seizures: A Report From the American Neuropsychiatric Association Committee on Research. *J Neuropsychiatry Clin Neurosci* 2021;33(1):27-42. doi: 10.1176/appi.neuropsych.19120354 [published Online First: 2020/08/12]
- S6. American Psychiatric Association. *Diagnostic and statistical manual of mental disorders (DSM-5)*. 5th edition. Washington, DC: American Psychiatric Pub 2013.

S7. Hallett M. Neurophysiologic studies of functional neurologic disorders. In: Hallett M, Stone J, Carson A, eds. *Functional Neurological Disorders*. Amsterdam: Elsevier 2016:61-71.

S8. Schwingenschuh P, Saifee TA, Katschnig-Winter P, et al. Validation of "laboratory-supported" criteria for functional (psychogenic) tremor. *Mov Disord* 2016;31(4):555-62. doi: 10.1002/mds.26525 [published Online First: 2016/02/18]

S9. Ambar Akkaoui M, Geoffroy PA, Roze E, et al. Functional Motor Symptoms in Parkinson's Disease and Functional Parkinsonism: A Systematic Review. *J Neuropsychiatry Clin Neurosci* 2020;32(1):4-13. doi: 10.1176/appi.neuropsych.19030058 [published Online First: 2019/08/31]

S10. Schmerler DA, Espay AJ. Functional dystonia. *Handb Clin Neurol* 2016;139:235-45. doi: 10.1016/B978-0-12-801772-2.00020-5 [published Online First: 2016/10/11]

S11. Mehta AR, Rowe JB, Trimble MR, et al. Coactivation sign in fixed dystonia. *Parkinsonism Relat Disord* 2013;19(4):474-6. doi: 10.1016/j.parkreldis.2012.10.014 [published Online First: 2012/12/04]

S12. Morgante F, Naro A, Terranova C, et al. Normal sensorimotor plasticity in complex regional pain syndrome with fixed posture of the hand. *Mov Disord* 2017;32(1):149-57. doi: 10.1002/mds.26836 [published Online First: 2017/01/27]

S13. Gelauff JM, Kingma EM, Kalkman JS, et al. Fatigue, not self-rated motor symptom severity, affects quality of life in functional motor disorders. *J Neurol* 2018;265(8):1803-09. doi: 10.1007/s00415-018-8915-7 [published Online First: 2018/06/04]

S14. Vechetova G, Slovak M, Kemlink D, et al. The impact of non-motor symptoms on the health-related quality of life in patients with functional movement disorders. *J*

Psychosom Res 2018;115:32-37. doi: 10.1016/j.jpsychores.2018.10.001 [published Online First: 2018/11/25]

S15. Baizabal-Carvallo JF, Hallett M, Jankovic J. Pathogenesis and pathophysiology of functional (psychogenic) movement disorders. *Neurobiol Dis* 2019;127:32-44. doi: 10.1016/j.nbd.2019.02.013 [published Online First: 2019/02/25]

S16. Diez I, Ortiz-Teran L, Williams B, et al. Corticolimbic fast-tracking: enhanced multimodal integration in functional neurological disorder. *J Neurol Neurosurg Psychiatry* 2019;90(8):929-38. doi: 10.1136/jnnp-2018-319657 [published Online First: 2019/03/10]

S17. Barrett LF. The theory of constructed emotion: an active inference account of interoception and categorization. *Soc Cogn Affect Neurosci* 2017;12(1):1-23. doi: 10.1093/scan/nsw154 [published Online First: 2016/11/01]

S18. Balachandran N, Goodman AM, Allendorfer JB, et al. Relationship between neural responses to stress and mental health symptoms in psychogenic nonepileptic seizures after traumatic brain injury. *Epilepsia* 2021;62(1):107-19 doi: 10.1111/epi.16758 [published Online First: 2020/11/26]

S19. Hailes HP, Yu R, Danese A, et al. Long-term outcomes of childhood sexual abuse: an umbrella review. *Lancet Psychiatry* 2019;6(10):830-39. doi: 10.1016/S2215-0366(19)30286-X [published Online First: 2019/09/15]

S20. Gray C, Calderbank A, Adewusi J, et al. Symptoms of posttraumatic stress disorder in patients with functional neurological symptom disorder. *J Psychosom Res* 2020;129:109907. doi: 10.1016/j.jpsychores.2019.109907 [published Online First: 2020/01/07]

- S21. Williams B, Ospina JP, Jalilianhasanpour R, et al. Fearful Attachment Linked to Childhood Abuse, Alexithymia, and Depression in Motor Functional Neurological Disorders. *J Neuropsychiatry Clin Neurosci* 2019;31(1):65-69. doi: 10.1176/appi.neuropsych.18040095 [published Online First: 2018/11/01]
- S22. Perez DL, Matin N, Barsky A, et al. Cingulo-insular structural alterations associated with psychogenic symptoms, childhood abuse and PTSD in functional neurological disorders. *J Neurol Neurosurg Psychiatry* 2017;88(6):491-97. doi: 10.1136/jnnp-2016-314998 [published Online First: 2017/04/19]
- S23. van Poppelen D, Saifee TA, Schwingenschuh P, et al. Attention to self in psychogenic tremor. *Mov Disord* 2011;26(14):2575-6. doi: 10.1002/mds.23911 [published Online First: 2011/10/26]
- S24. Pares I, Kojovic M, Pires C, et al. Physical precipitating factors in functional movement disorders. *J Neurol Sci* 2014;338(1-2):174-7. doi: 10.1016/j.jns.2013.12.046 [published Online First: 2014/01/21]
- S25. Perry CG, Holmes KG, Gruber-Baldini AL, et al. Are Patients with Psychogenic Movement Disorders More Likely to be Healthcare Workers? *Mov Disord Clin Pract* 2017;4(1):62-67. doi: 10.1002/mdc3.12351 [published Online First: 2016/04/26]
- S26. Kranick S, Ekanayake V, Martinez V, et al. Psychopathology and psychogenic movement disorders. *Mov Disord* 2011;26(10):1844-50. doi: 10.1002/mds.23830 [published Online First: 2011/06/30]
- S27. Nielsen G, Buszewicz M, Edwards MJ, et al. A qualitative study of the experiences and perceptions of patients with functional motor disorder. *Disabil Rehabil*

2020;42(14):2043-48. doi: 10.1080/09638288.2018.1550685 [published Online First: 2019/01/24]

S28. Barnett C, Davis R, Mitchell C, et al. The vicious cycle of functional neurological disorders: a synthesis of healthcare professionals' views on working with patients with functional neurological disorder. *Disabil Rehabil* 2020:1-10. doi: 10.1080/09638288.2020.1822935 [published Online First: 2020/09/25]

S29. Adams C, Anderson J, Madva EN, et al. You've made the diagnosis of functional neurological disorder: now what? *Pract Neurol* 2018;18(4):323-30. doi: 10.1136/practneurol-2017-001835 [published Online First: 2018/05/17]

S30. Aybek S, Lidstone SC, Nielsen G, et al. What Is the Role of a Specialist Assessment Clinic for FND? Lessons from Three National Referral Centers. *J Neuropsychiatry Clin Neurosci* 2020;32(1):79-84. doi: 10.1176/appi.neuropsych.19040083 [published Online First: 2019/10/08]

S31. Jacob AE, Smith CA, Jablonski ME, et al. Multidisciplinary clinic for functional movement disorders (FMD): 1-year experience from a single centre. *J Neurol Neurosurg Psychiatry* 2018;89(9):1011-12. doi: 10.1136/jnnp-2017-316523 [published Online First: 2017/11/17]

S32. Czarnecki K, Thompson JM, Seime R, et al. Functional movement disorders: successful treatment with a physical therapy rehabilitation protocol. *Parkinsonism Relat Disord* 2012;18(3):247-51. doi: 10.1016/j.parkreldis.2011.10.011 [published Online First: 2011/11/25]

S33. Demartini B, Batla A, Petrochilos P, et al. Multidisciplinary treatment for functional neurological symptoms: a prospective study. *J Neurol* 2014;261(12):2370-7. doi:

10.1007/s00415-014-7495-4 [published Online First: 2014/09/23]

S34. Demartini B, Bombieri F, Goeta D, et al. A physical therapy programme for functional motor symptoms: A telemedicine pilot study. *Parkinsonism Relat Disord*

2020;76:108-11. doi: 10.1016/j.parkreldis.2019.05.004 [published Online First: 2019/05/13]

S35. Hebert C, Behel JM, Pal G, et al. Multidisciplinary inpatient rehabilitation for Functional Movement Disorders: A prospective study with long term follow up.

*Parkinsonism Relat Disord* 2020;82:50-55. doi: 10.1016/j.parkreldis.2020.11.018 [published Online First: 2020/11/29]

S36. Jacob AE, Kaelin DL, Roach AR, et al. Motor Retraining (MoRe) for Functional Movement Disorders: Outcomes From a 1-Week Multidisciplinary Rehabilitation

Program. *PM R* 2018;10(11):1164-72. doi: 10.1016/j.pmrj.2018.05.011 [published Online First: 2018/05/22]

S37. Jimenez XF, Aboussouan A, Johnson J. Functional Neurological Disorder Responds Favorably to Interdisciplinary Rehabilitation Models. *Psychosomatics*

2019;60(6):556-62. doi: 10.1016/j.psych.2019.07.002 [published Online First: 2019/08/11]

S38. Maggio JB, Ospina JP, Callahan J, et al. Outpatient Physical Therapy for Functional Neurological Disorder: A Preliminary Feasibility and Naturalistic Outcome

Study in a U.S. Cohort. *J Neuropsychiatry Clin Neurosci* 2020;32(1):85-89. doi: 10.1176/appi.neuropsych.19030068 [published Online First: 2019/10/01]

- S39. Matthews A, Brown M, Stone J. Inpatient Physiotherapy for Functional (Psychogenic) Gait Disorder: A Case Series of 35 Patients. *Mov Disord Clin Pract* 2016;3(6):603-06. doi: 10.1002/mdc3.12325 [published Online First: 2016/01/29]
- S40. McCormack R, Moriarty J, Mellers JD, et al. Specialist inpatient treatment for severe motor conversion disorder: a retrospective comparative study. *J Neurol Neurosurg Psychiatry* 2014;85(8):895-900. doi: 10.1136/jnnp-2013-305716 [published Online First: 2013/10/15]
- S41. Nielsen G, Ricciardi L, Demartini B, et al. Outcomes of a 5-day physiotherapy programme for functional (psychogenic) motor disorders. *J Neurol* 2015;262(3):674-81. doi: 10.1007/s00415-014-7631-1 [published Online First: 2015/01/06]
- S42. Saifee TA, Kassavetis P, Parees I, et al. Inpatient treatment of functional motor symptoms: a long-term follow-up study. *J Neurol* 2012;259(9):1958-63. doi: 10.1007/s00415-012-6530-6 [published Online First: 2012/05/16]
- S43. Theuer RV, Neves SVN, Champs APS. Rehabilitation for motor functional neurological disorder: a follow-up study of 185 patients. *Arq Neuropsiquiatr* 2020;78(6):331-36. doi: 10.1590/0004-282X20200009 [published Online First: 2020/06/11]
- S44. Hubschmid M, Aybek S, Maccaferri GE, et al. Efficacy of brief interdisciplinary psychotherapeutic intervention for motor conversion disorder and nonepileptic attacks. *Gen Hosp Psychiatry* 2015;37(5):448-55. doi: 10.1016/j.genhosppsy.2015.05.007 [published Online First: 2015/06/24]
- S45. Kompoliti K, Wilson B, Stebbins G, et al. Immediate vs. delayed treatment of psychogenic movement disorders with short term psychodynamic psychotherapy:

randomized clinical trial. *Parkinsonism Relat Disord* 2014;20(1):60-3. doi:

10.1016/j.parkreldis.2013.09.018 [published Online First: 2013/10/15]

S46. O'Connell N, Watson G, Grey C, et al. Outpatient CBT for Motor Functional Neurological Disorder and Other Neuropsychiatric Conditions: A Retrospective Case Comparison. *J Neuropsychiatry Clin Neurosci* 2020;32(1):58-66. doi:

10.1176/appi.neuropsych.19030067 [published Online First: 2019/08/31]

S47. Bolger A, Collins A, Michels M, et al. Characteristics and Outcomes of Children With Conversion Disorder Admitted to a Single Inpatient Rehabilitation Unit, A Retrospective Study. *PM R* 2018;10(9):910-16. doi: 10.1016/j.pmrj.2018.03.004

[published Online First: 2018/03/20]

S48. Butz C, Iske C, Truba N, et al. Treatment of Functional Gait Abnormality in a Rehabilitation Setting: Emphasizing the Physical Interventions for Treating the Whole Child. *Innov Clin Neurosci* 2019;16(7-08):18-21. [published Online First: 2019/12/14]

S49. Kozłowska K, Nicola G, Stephen S, et al. Psychologically informed physiotherapy as part of a multidisciplinary rehabilitation program for children and adolescents with functional neurological disorder: Physical and mental health outcomes. *J Paediatr Child Health* 2020 doi: 10.1111/jpc.15122 [published Online First: 2020/08/30]

S50. Edwards MJ, Bhatia KP, Cordivari C. Immediate response to botulinum toxin injections in patients with fixed dystonia. *Mov Disord* 2011;26(5):917-8. doi:

10.1002/mds.23562 [published Online First: 2011/03/12]

S51. Pollak TA, Nicholson TR, Edwards MJ, et al. A systematic review of transcranial magnetic stimulation in the treatment of functional (conversion) neurological symptoms.



J Neurol Neurosurg Psychiatry 2014;85(2):191-7. doi: 10.1136/jnnp-2012-304181

[published Online First: 2013/01/11]

S52. Lehn A, Bullock-Saxton J, Newcombe P, et al. Survey of the perceptions of health practitioners regarding Functional Neurological Disorders in Australia. J Clin Neurosci 2019;67:114-23. doi: 10.1016/j.jocn.2019.06.008 [published Online First: 2019/06/24]

S53. Popkirov S, Stone J, Buchan AM. Functional Neurological Disorder: A Common and Treatable Stroke Mimic. Stroke 2020;51(5):1629-35. doi: 10.1161/STROKEAHA.120.029076 [published Online First: 2020/04/17]

S54. Gelauff J, Stone J, Edwards M, et al. The prognosis of functional (psychogenic) motor symptoms: a systematic review. J Neurol Neurosurg Psychiatry 2014;85(2):220-6. doi: 10.1136/jnnp-2013-305321 [published Online First: 2013/09/14]

S55. MacDuffie KE, Grubbs L, Best T, et al. Stigma and FND: A Research Agenda Targeting the Clinical Encounter. CNS Spectr 2020:1-19. doi: 10.1017/S1092852920002084 [published Online First: 2020/12/04]

S56. Monzoni CM, Duncan R, Grunewald R, et al. How do neurologists discuss functional symptoms with their patients: a conversation analytic study. J Psychosom Res 2011;71(6):377-83. doi: 10.1016/j.jpsychores.2011.09.007 [published Online First: 2011/11/29]

S57. Popkirov S, Nicholson TR, Bloem BR, et al. Hiding in Plain Sight: Functional Neurological Disorders in the News. J Neuropsychiatry Clin Neurosci 2019;31(4):361-67. doi: 10.1176/appi.neuropsych.19010025 [published Online First: 2019/05/24]

S58. Popkirov S, Baguley DM, Carson AJ, et al. The neurology of the Cuban "sonic attacks". *Lancet Neurol* 2019;18(9):817-18. doi: 10.1016/S1474-4422(19)30246-7

[published Online First: 2019/07/08]

S59. Kozłowska K, Chudleigh C, Elliott B, et al. The body comes to family therapy: Treatment of a school-aged boy with hyperventilation-induced non-epileptic seizures. *Clin Child Psychol Psychiatry* 2016;21(4):669-85. doi: 10.1177/1359104515621960

[published Online First: 2016/11/04]
