# Supplementary material
Source: PubMed Central journal article supplement (PMC8440656)
Supplement: NIHMS1685116-supplement-Supplementary_Table_1.pdf [file NIHMS1685116-supplement-Supplementary_Table_1.pdf]

**Supplementary Table 1. Other notable cohort treatment studies in motor functional neurological disorder.**

| Study                                                    | n          | Description                                                                                                                                                                                                                                                                                                                                                                                                      | Key Points                                                                                                                                                                                                                                                                  |
|----------------------------------------------------------|------------|------------------------------------------------------------------------------------------------------------------------------------------------------------------------------------------------------------------------------------------------------------------------------------------------------------------------------------------------------------------------------------------------------------------|-----------------------------------------------------------------------------------------------------------------------------------------------------------------------------------------------------------------------------------------------------------------------------|
| <b>Multidisciplinary rehabilitation – cohort studies</b> |            |                                                                                                                                                                                                                                                                                                                                                                                                                  |                                                                                                                                                                                                                                                                             |
| Theuer et al 2020 [S43]                                  | 129        | <p>Retrospective review of patients admitted to a rehabilitation unit over a 20-year period. 185 patients were identified, 129 received treatment (multidisciplinary rehabilitation).</p> <p><u>Duration and setting:</u><br/>length of inpatient stay not reported</p> <p><u>Outcome measures:</u><br/>Improvement defined as remission of symptoms, marked improvement (75%) or moderate improvement (50%)</p> | <p>Treatment involved physiotherapy, occupational activities, psychiatric, and psychological support.</p> <p>After treatment, 70% of patients improved (36.2% with complete remission).</p> <p>Younger patients and those with an acute onset had a better outcome.</p>     |
| Hebert et al 2020 [S35]                                  | 20         | <p>Prospective cohort study of multidisciplinary rehabilitation based on the MoRe protocol in patients with functional movement disorders.</p> <p><u>Duration and setting:</u><br/>mean 7.5 inpatient days</p> <p><u>Outcome measures:</u> CGI-severity; MAS; FGA; BBS; TUG; FIST; FIM</p>                                                                                                                       | <p>17 of 20 patients completed inpatient rehabilitation. 93% of patients completing treatment rated themselves as much improved. While not statistically significant at 1-year follow-up, patient-rated improvement was noted in 10 of 13 patients with available date.</p> |
| Kozłowska et al. 2020 [S49]                              | 57, 60, 25 | <p>Three prospective cohort studies of pediatric multidisciplinary rehabilitation.</p> <p><u>Duration and setting:</u> 1-3 weeks, inpatient</p>                                                                                                                                                                                                                                                                  | <p>67%, 53%, and 80% of children in the 3 cohorts had mFND.</p> <p>Treatment included physiotherapy, psychotherapy (individual and family), attendance at hospital school,</p>                                                                                              |

|                          |     |                                                                                                                                                                                                                                                                                                                                                                                         |                                                                                                                                                                                                                                                                                                                                              |
|--------------------------|-----|-----------------------------------------------------------------------------------------------------------------------------------------------------------------------------------------------------------------------------------------------------------------------------------------------------------------------------------------------------------------------------------------|----------------------------------------------------------------------------------------------------------------------------------------------------------------------------------------------------------------------------------------------------------------------------------------------------------------------------------------------|
|                          |     | <p><u>Outcome measures:</u><br/>GAF, resolution of FND, return to school</p>                                                                                                                                                                                                                                                                                                            | <p>and reintegration to home school post discharge.</p> <p>FND symptoms resolved in 95%, 85% and 88%, and 61%, 53% and 52% returned to full health and to full-time school.</p>                                                                                                                                                              |
| Butz et al 2019 [S48]    | 100 | <p>Prospective cohort study of pediatric multidisciplinary rehabilitation.</p> <p><u>Duration and setting:</u><br/>average 10.5 days (range 2-103 days), inpatient</p> <p><u>Outcome measures:</u><br/>WeeFIM</p>                                                                                                                                                                       | <p>All children had mFND. 94/100 completed the program.</p> <p>Treatment included physiotherapy, occupational therapy and recreational therapy, schooling support, and psychotherapy.</p> <p>85% of children reached the maximum WeeFIM score at discharge (full recovery sustained at 2 months).</p>                                        |
| Jimenez et al 2019 [S37] | 63  | <p>Retrospective review of patients with functional motor symptoms participating in an interdisciplinary chronic pain rehabilitation program over a 4-year period.</p> <p><u>Duration and setting:</u> 5 days a week (intensive outpatient), for 3-4 weeks</p> <p><u>Outcome measures:</u><br/>pain-disability index; mean timed up and go; mean stair climbing; 6-minute walk test</p> | <p>The cohort of patients had pain plus mixed FND symptoms including functional movement disorders and functional seizures.</p> <p>On discharged, participants showed improvements in a range of outcome measures including pain related disability, depression, anxiety, and physical function. There was a 22% treatment dropout rate.</p> |
| Jacob et al 2018 [S36]   | 32  | <p>Retrospective cohort study of specialist multidisciplinary rehabilitation.</p>                                                                                                                                                                                                                                                                                                       | <p>This study replicates the intervention described by (Czarnecki et al 2012) – see below. The focus of treatment is motor retraining and psychotherapy.</p>                                                                                                                                                                                 |

|                            |    |                                                                                                                                                                                                                                                                                |                                                                                                                                                                                                                                                                                                                                                                                                                                                                                                                  |
|----------------------------|----|--------------------------------------------------------------------------------------------------------------------------------------------------------------------------------------------------------------------------------------------------------------------------------|------------------------------------------------------------------------------------------------------------------------------------------------------------------------------------------------------------------------------------------------------------------------------------------------------------------------------------------------------------------------------------------------------------------------------------------------------------------------------------------------------------------|
|                            |    | <p><u>Duration and setting:</u><br/>one-week, inpatient</p> <p><u>Outcome measures:</u> CGI-patient rated, PMDRS</p>                                                                                                                                                           | <p>87% of patients reported improvement at the end of treatment. At 6-month follow-up, this reduced to 69%. Improvements occurred despite the long average symptom duration of 7.4 years.</p>                                                                                                                                                                                                                                                                                                                    |
| Bolger et al 2018 [S47]    | 30 | <p>Retrospective cohort study of pediatric multidisciplinary rehabilitation.</p> <p><u>Duration and setting:</u> 8.4 ± 4.2 days, inpatient</p> <p><u>Outcome measures:</u><br/>WeeFIM</p>                                                                                      | <p>25/30 children had mFND as part of their clinical presentation.</p> <p>Treatment included physiotherapy, occupational therapy, recreational, and music therapy, and psychological support.</p> <p>WeeFIM score change of 30 ± 11.9 (P &lt;.001), maintained at 3 months.</p>                                                                                                                                                                                                                                  |
| Demartini et al 2014 [S33] | 66 | <p>Prospective cohort study of multidisciplinary rehabilitation.</p> <p><u>Duration and setting:</u> 4-weeks, inpatient</p> <p><u>Outcome measures:</u> CGI-patient rated; Health of the Nation Outcome Scale; COPM; PHQ-15; The Common Neurological Symptom Questionnaire</p> | <p>Together with Saifee et al (2012) below, the outcomes of a 4-week multidisciplinary rehabilitation program for patients with chronic mFND symptoms are reported.</p> <p>Significant but modest improvements were seen in a range of assessments post treatment and at 12-month follow-up (55% retention at 12 months). This included two-thirds of individuals rating their general health as better or much better at discharge; similar though slightly less positive gains were reported at 12-months.</p> |
| McCormack et al 2014 [S40] | 33 | <p>Retrospective cohort study of inpatient rehabilitation.</p> <p><u>Duration and setting:</u><br/>101-day median length of stay, inpatient</p>                                                                                                                                | <p>Similar to Demartini et al (2014) above, the outcomes of patients admitted for rehabilitation on a neuropsychiatric unit are presented. Outcomes are reported at discharge, with no follow up data. As with Demartini</p>                                                                                                                                                                                                                                                                                     |

|                                              |    |                                                                                                                                                                                                                                                                                                                              |                                                                                                                                                                                                                                                                                                                                                                                                     |
|----------------------------------------------|----|------------------------------------------------------------------------------------------------------------------------------------------------------------------------------------------------------------------------------------------------------------------------------------------------------------------------------|-----------------------------------------------------------------------------------------------------------------------------------------------------------------------------------------------------------------------------------------------------------------------------------------------------------------------------------------------------------------------------------------------------|
|                                              |    | <p><u>Outcome measures:</u><br/>qualitative mobility and ADL performance, MRS</p>                                                                                                                                                                                                                                            | <p>et al (2014), improvements are seen despite long symptom durations and complex psychiatric comorbidity.</p>                                                                                                                                                                                                                                                                                      |
| <p>Czarnecki et al 2012 [S32]</p>            | 60 | <p>Retrospective cohort study of a multidisciplinary rehabilitation vs. treatment-as-usual controls.</p> <p><u>Duration and setting:</u> 5 consecutive days, intensive outpatient</p> <p><u>Outcome measures:</u> physician-rated improvement; patient-rated improvement (5-pt Likert) scale at 25 months post-treatment</p> | <p>This study reports the outcomes of an established specialist rehabilitation program with a focus on motor retraining with psychotherapy input. Treatment includes twice daily physical/occupational therapy and speech therapy if relevant.</p> <p>69% of patients rated themselves as improved after treatment. At long-term follow up, 60% of patients reported to have remained improved.</p> |
| <p>Saifee et al 2012 [S42]</p>               | 26 | <p>Retrospective cohort study of multidisciplinary rehabilitation.</p> <p><u>Duration and setting:</u> 24-day median length of stay, inpatient</p> <p><u>Outcome measures:</u> WSAS, time bothered by symptoms via visual analogue scale</p>                                                                                 | <p>See Demartini et al (2014), above.</p>                                                                                                                                                                                                                                                                                                                                                           |
| <p><b>Physiotherapy - cohort studies</b></p> |    |                                                                                                                                                                                                                                                                                                                              |                                                                                                                                                                                                                                                                                                                                                                                                     |
| <p>Maggio et al 2020 [S38]</p>               | 50 | <p>Retrospective cohort study of outpatient physiotherapy in consecutive patients.</p> <p><u>Duration and setting:</u> 6-12, 60-minute outpatient sessions</p>                                                                                                                                                               | <p>This study found that physiotherapy delivered in an outpatient setting, in a less intensive manner than previous rehabilitation studies, has the potential to benefit patients with mFND.</p>                                                                                                                                                                                                    |

|                                                       |                 |                                                                                                                                                                                                                                                           |                                                                                                                                                                                                                                                                                      |
|-------------------------------------------------------|-----------------|-----------------------------------------------------------------------------------------------------------------------------------------------------------------------------------------------------------------------------------------------------------|--------------------------------------------------------------------------------------------------------------------------------------------------------------------------------------------------------------------------------------------------------------------------------------|
|                                                       |                 | <p><u>Outcome measures:</u><br/>ability to tolerate final session asymptotically or demonstrate “marked improvement”</p>                                                                                                                                  | <p>34% improved and 20% were asymptomatic at the end of treatment.</p>                                                                                                                                                                                                               |
| Demartini et al 2020 [S34]                            | 21              | <p>Prospective cohort study of physiotherapy, supplemented by psychiatry, delivered by telehealth.</p> <p><u>Duration and setting:</u> 24 sessions, including 21 weekly tele-sessions</p> <p><u>Outcome measures:</u> PMDRS, SF-36, CGI-patient rated</p> | <p>This unique study combined physiotherapy with psychiatry input delivered remotely over telehealth.</p> <p>At the end of treatment, 78% of patients reported improvement, which was associated with statistical improvements in physical and quality of life outcome measures.</p> |
| Matthews et al 2016 [S39]                             | 35              | <p>Prospective cohort study of physiotherapy treatment.</p> <p><u>Duration and setting:</u> 18 days (mean length of stay), inpatient</p> <p><u>Outcome measures:</u> MRIMI</p>                                                                            | <p>Patients with functional gait disorder received physiotherapy during admission to an acute neurology hospital ward. A mean of 11 sessions were provided over 18 days. A significant improvement in the MRIMI was reported at the end of treatment.</p>                            |
| Nielsen 2015 [S41]                                    | 47              | <p>Prospective cohort study of physiotherapy treatment programme.</p> <p><u>Duration and setting:</u> 5-day, intensive outpatient</p> <p><u>Outcome measures:</u> SF-36, EQ-5D-5L, WSAS, BBS, 10-meter walk test</p>                                      | <p>This cohort study was an early assessment of the intervention that was tested in the feasibility study, Nielsen et al (2017), reported above.</p>                                                                                                                                 |
| <b>Cognitive behavioural therapy – cohort studies</b> |                 |                                                                                                                                                                                                                                                           |                                                                                                                                                                                                                                                                                      |
| O’Connell et al 2020 [S46]                            | 98 <sup>a</sup> | <p>Retrospective review of CBT for mFND.</p>                                                                                                                                                                                                              | <p>Observational study revealed improvements in physical and psychological functioning were similar for patients with mFND</p>                                                                                                                                                       |

|                                           |    |                                                                                                                                                                                                                                                                |                                                                                                                                                                                                                                                                                  |
|-------------------------------------------|----|----------------------------------------------------------------------------------------------------------------------------------------------------------------------------------------------------------------------------------------------------------------|----------------------------------------------------------------------------------------------------------------------------------------------------------------------------------------------------------------------------------------------------------------------------------|
|                                           |    | <p><u>Duration and setting:</u> 12-15 sessions, outpatient</p> <p><u>Outcome measures:</u> 3-point scale of improvement based on clinical note review, CORE-OM</p>                                                                                             | and patients with other neuropsychiatric condition who were treated in a specialist CBT clinic.                                                                                                                                                                                  |
| Espay et al 2019 <sup>26</sup>            | 15 | <p>Prospective unblinded CBT for mFND.</p> <p><u>Duration and setting:</u> 12-weekly 1 hour sessions, outpatient</p> <p><u>Outcome measures:</u> PMDRS</p>                                                                                                     | Functional tremor severity improved significantly after 12 weeks of CBT. The improvement was associated with changes in the anterior cingulate / paracingulate activity on fMRI.                                                                                                 |
| <b>Psychodynamic psychotherapy – RCTs</b> |    |                                                                                                                                                                                                                                                                |                                                                                                                                                                                                                                                                                  |
| Kompoliti et al 2014 [S45]                | 15 | <p>Randomized cross-over design study of psychodynamic psychotherapy vs. continued observation and support by a neurologist.</p> <p><u>Duration and setting:</u> 12 weekly 1 hour sessions, outpatient</p> <p><u>Outcome measures:</u> CGI-severity, PMDRS</p> | While patients in both groups improved in terms of CGI-severity scores with time, there were no statistically significant group-level differences at 3-months.                                                                                                                   |
| Hubschmid et al 2015 [S44]                | 23 | <p>Randomized study of interdisciplinary psychotherapeutic intervention (psychodynamic interpersonal treatment) vs. standard care.</p> <p><u>Duration and setting:</u> 4-6 sessions over a 2-month period, outpatient</p>                                      | <p>Outcome assessments occurred at 2, 6 and 12-months post intervention initiation.</p> <p>SDQ-20 and CGI scores showed statistically significant group x time effects favouring the group receiving the interdisciplinary psychotherapeutic intervention vs. standard care.</p> |

|  |  |                                                                                |                                                                                                                                                                                        |
|--|--|--------------------------------------------------------------------------------|----------------------------------------------------------------------------------------------------------------------------------------------------------------------------------------|
|  |  | <u>Outcome measures:</u><br>SDQ-20, CGI, MRS,<br>healthcare utilization, SF-36 | The intervention group also showed reduced inpatient hospital use compared to standard care. There were, however, no treatment group differences in terms of reported quality of life. |
|--|--|--------------------------------------------------------------------------------|----------------------------------------------------------------------------------------------------------------------------------------------------------------------------------------|

<sup>a</sup> the study included 174 participants, of which only 98 had a diagnosis of mFND. Additionally, outcome measures listed in this table focus on the selected physical functioning and quality of life instruments used in each study. Abbreviations: ADL, activities of daily living; BBS, Berg Balance Scale; CBT, Cognitive Behavioural Therapy; CGI, Clinical Global Improvement scale; COPM, Canadian Occupational Performance Measure; CORE-OM, Clinical Outcomes in Routine Evaluation-Outcome Measure; FGA Functional Gait Assessment; FIM, Functional Independence Measures; FIST, Function in Sitting Test; GAF, Global Assessment of Function; MAS, motor assessment scale; mFND, motor functional neurologic disorder; MRIMI, modified Rivermead Mobility Index, MRS, modified Rankin scale; PHQ-15, Patient Health Questionnaire 15; PHQ-9, Patient Health Questionnaire 9; PMDRS, Psychogenic Movement Disorder Rating Scale; RCT, randomized controlled trial; SF-36, Short Form Health Survey – 36; SDQ-20, Somatoform Dissociation Questionnaire – 20; TUG, Timed Up and Go; WeeFIM, Functional Independence Measure for Children; WSAS, Work and Social Adjustment Scale.
